# Supplementary material
Source: PubMed Central journal article supplement (PMC6304958)
Supplement: pnas.1816539115.sapp.pdf [file pnas.1816539115.sapp.pdf]

## Supplementary Methods

### Plasmids

To construct plasmids pRS426-*SAE2* (2 $\mu$ ) and pRS416-*SAE2* (*CEN*), the 1,038 bp *SAE2* ORF flanked by 370 bp upstream promoter and 36 bp synthetic MYC epitope were amplified by PCR from genomic DNA of LSY0678 and the resulting product was cloned into BamHI-Sall digested pRS426 or pRS416 (primers are available on request). pRS416-*sae2*-5A was made using plasmid pML487 as a template (1). pRS416-*sae2*-S267A and pRS416-*sae2*-T90A, T279A (2A) were made by site-directed mutagenesis of pRS416-*SAE2* (Agilent QuickChange II kit). pRS416-*SAE2*-13MYC was made by PCR amplification of *SAE2* with a 13MYC tag from genomic DNA of LSY3942-8C and the resulting fragment was cloned into NruI-Sall-digested pRS416-*SAE2*. Plasmids pRS416-*sae2*-S267A-13MYC, pRS416-*sae2*-2A-13MYC and pRS416-*sae2*-5A-13MYC were made by sub-cloning NruI-BsiWI fragments containing the phosphorylation site mutant alleles from pRS416-*sae2*-S267A, pRS416-*sae2*-2A, pRS416-*sae2*-5A into NruI-BsiWI-digested pRS416-*SAE2*-13MYC. *Sae2* overexpression plasmids, pRS416-*GAL*-*SAE2* was made by PCR amplifying a 693 bp BglIII-NruI fragment containing the *GAL1* promoter and the 5' part of *SAE2* from LSY3942-8C genomic DNA and cloning into BamHI-NruI-digested pRS416-*SAE2*. Then a SpeI-NruI 699 bp fragments containing the *GAL1* promoter and partial 5' *SAE2* from pRS416-*GAL*-*SAE2* was sub-cloned into SpeI-NruI-digested pRS416-*sae2*-S267A, pRS416-*sae2*-2A, pRS416-*sae2*-5A to obtain pRS416-*GAL*-*sae2*-S267A, pRS416-*GAL*-*sae2*-2A, and pRS416-*GAL*-*sae2*-5A.

**Table S1. *Saccharomyces cerevisiae* strains used in this study**

| <b>Strain</b> | <b>Relevant genotype</b>                                                                   | <b>Source</b> |
|---------------|--------------------------------------------------------------------------------------------|---------------|
| LSY0678       | <i>MATa ade2-1 can1 his3-11,15 leu2-3,112 trp1-1 ura3-1</i><br><i>RAD5</i>                 | (2)           |
| LSY1091       | <i>MATa sae2::KanMX6</i>                                                                   | (3)           |
| LSY3366       | <i>MATa mre11-H125N-NatMX4 (mre11-nd)</i>                                                  | (4)           |
| LSY2872-2A    | <i>MATα rad50K81I-URA3 (rad50S)</i>                                                        | (5)           |
| LSY2363-28C   | <i>MATa mec1::TRP1 sml1::HIS3</i>                                                          | (5)           |
| LSY3769-8C    | <i>MATa mre11-H125N-NatMX4 mec1::TRP1 sml1::HIS3</i>                                       | This study    |
| LSY3770-2A    | <i>MATa rad50S-URA3 mec1::TRP1 sml1::HIS3</i>                                              | This study    |
| LSY3769-12D   | <i>MATa sae2::KanMX6 mec1::TRP1 sml1::HIS3</i>                                             | This study    |
| LSY3299-1D    | <i>MATa sgs1::HphMX4 leu2::GAL-HO-LEU2 hml::oriPRS</i><br><i>hmr::ampR</i>                 | This study    |
| LSY3753-6B    | <i>MATa sgs1::HphMX4 mre11-H125N</i><br><i>leu2::GAL-HO-LEU2 hml::oriPRS hmr::ampR</i>     | This study    |
| LSY3850-2B    | <i>sgs1::HphMX4 rad50S-URA3 leu2::GAL-HO-LEU2</i><br><i>hml::oriPRS hmr::ampR</i>          | This study    |
| LSY3671-2C    | <i>MATa RAD9-3HA-KanMX6 leu2::GAL-HO-LEU2</i><br><i>hml::oriPRS hmr::ampR</i>              | This study    |
| LSY4018-1B    | <i>MATα RAD9-3HA-KanMX6 leu2::GAL-HO-LEU2</i><br><i>hml::oriPRS hmr::ampR</i>              | This study    |
| LSY3682-3C    | <i>MATα mre11-H125N RAD9-3HA-KanMX6</i><br><i>leu2::GAL-HO-LEU2 hml::oriPRS hmr::ampR</i>  | This study    |
| LSY3974-9D    | <i>MATα rad50S-URA3 RAD9-3HA-KanMX6</i><br><i>leu2::GAL-HO-LEU2 hml::oriPRS hmr::ampR</i>  | This study    |
| LSY3681-5C    | <i>MATα sae2::KanMX6 RAD9-3HA-KanMX6</i><br><i>leu2::GAL-HO-LEU2 hml::oriPRS hmr::ampR</i> | This study    |
| LSY3684-6C    | <i>MATα 3HA-TEL1-URA3 leu2::GAL-HO-LEU2</i><br><i>hml::oriPRS hmr::ampR</i>                | (6)           |
| LSY3697-1B    | <i>MATα 3HA-TEL1-URA3 mre11-H125N</i><br><i>leu2::GAL-HO-LEU2 hml::oriPRS hmr::ampR</i>    | This study    |
| LSY3976-2A    | <i>MATα 3HA-TEL1-URA3 rad50S-URA3</i>                                                      | This study    |

|             |                                                                                                                         |                             |
|-------------|-------------------------------------------------------------------------------------------------------------------------|-----------------------------|
|             | <i>leu2::GAL-HO-LEU2 hml::oriPRS hmr::ampR</i>                                                                          |                             |
| LSY3696-3D  | <i>MAT<math>\alpha</math> 3HA-TEL1-URA3 sae2::KanMX6</i><br><i>leu2::GAL-HO-LEU2 hml::oriPRS hmr::ampR</i>              | This study                  |
| LSY3596-1   | <i>rad9::HIS3</i>                                                                                                       | This study                  |
| LSY3771-2D  | <i>rad9::HIS3 mre11-H125N-NatMX</i>                                                                                     | This study                  |
| LSY3772-1D  | <i>rad9::HIS3 rad50S-URA3</i>                                                                                           | This study                  |
| LSY3597-1   | <i>rad9::HIS3 sae2::KanMX</i>                                                                                           | This study                  |
| LSY3849-8A  | <i>rad9::HIS3 sgs1::HphMX leu2::GAL-HO-LEU2</i><br><i>hml::oriPRS hmr::ampR</i>                                         | This study                  |
| LSY3849-3C  | <i>mre11-H125N rad9::HIS3 sgs1::HphMX</i><br><i>leu2::GAL-HO-LEU2 hml::oriPRS hmr::ampR</i>                             | This study                  |
| LSY3851-9C  | <i>rad50S-URA3 rad9::HIS3 sgs1::HphMX</i><br><i>leu2::GAL-HO-LEU2 hml::oriPRS hmr::ampR</i>                             | This study                  |
| LSY3852-1B  | <i>sae2::KanMX rad9::HIS3 sgs1::HphMX</i><br><i>leu2::GAL-HO-LEU2 hml::oriPRS hmr::ampR</i>                             | This study                  |
| LSY3590-14D | <i>MAT<math>\alpha</math> tel1-G2611D, D2612A, N2616K, D2631E-LEU2</i><br><i>(tel1-kd)</i>                              | This study                  |
| LSY3690-1B  | <i>tel1-kd-LEU2 mre11-H125N-NatMX</i>                                                                                   | This study                  |
| LSY3926-1C  | <i>tel1-kd-LEU2 rad50S-URA3</i>                                                                                         | This study                  |
| LSY3590-8D  | <i>MAT<math>\alpha</math> tel1-kd-LEU2 sae2::KanMX</i>                                                                  | This study                  |
| LSY3917-1C  | <i>MAT<math>\alpha</math> tel1-kd-LEU2 RAD9-3HA-KanMX</i><br><i>leu2::GAL-HO-LEU2 hml::oriPRS hmr::ampR</i>             | This study                  |
| LSY3915-3A  | <i>MAT<math>\alpha</math> tel1::HphMX RAD9-3HA-KanMX</i><br><i>leu2::GAL-HO-LEU2 hml::oriPRS hmr::ampR</i>              | This study                  |
| LSY3919-10D | <i>MAT<math>\alpha</math> tel1-kd-LEU2 sae2::KanMX RAD9-3HA-KanMX</i><br><i>leu2::GAL-HO-LEU2 hml::oriPRS hmr::ampR</i> | This study                  |
| LSY3914-4D  | <i>MAT<math>\alpha</math> tel1::HphMX sae2::KanMX RAD9-3HA-KanMX</i><br><i>leu2::GAL-HO-LEU2 hml::oriPRS hmr::ampR</i>  | This study                  |
| LSY2127     | <i>MAT<math>\alpha</math> rad53-K227A-KanMX</i>                                                                         | (Pike <i>et al.</i> , 2003) |
| LSY3551     | <i>MAT<math>\alpha</math> rad53-K227A-KanMX sae2::HIS3</i>                                                              | This study                  |
| LSY3689     | <i>rad53-K227A-KanMX mre11-H125N-NatMX</i>                                                                              | This study                  |
| LSY3938-11C | <i>rad53-K227A-KanMX rad50S-URA3</i>                                                                                    | This study                  |
| LSY3574     | <i>rad53-R605A</i>                                                                                                      | (7)                         |

|             |                                                                                                            |            |
|-------------|------------------------------------------------------------------------------------------------------------|------------|
| LSY3909-7B  | <i>rad53-R605A mre11-H125N</i>                                                                             | This study |
| LSY3920-1A  | <i>rad53-R605A rad50S-URA3</i>                                                                             | This study |
| LSY3908-5B  | <i>MATa rad53-R605A sae2::KanMX</i>                                                                        | This study |
| LSY3958-2C  | <i>MATa exo1-S372A, S567A, S587A, S692A-13myc-HIS3 (exo1-4S::A)</i>                                        | (8)        |
| LSY3959-2A  | <i>mre11-H125N-NatMX4 exo1-4S::A-13myc-HIS3</i>                                                            | This study |
| LSY3960-2A  | <i>rad50S-URA3 exo1-4S::A-13myc-HIS3</i>                                                                   | This study |
| LSY3958-9D  | <i>sae2::KanMX exo1-4S::A-13myc-HIS3</i>                                                                   | This study |
| LSY3195-2B  | <i>MATα DNA2-TEV-9MYC-HIS3 leu2::GAL-HO-LEU2 hml::oriPRS hmr::ampR</i>                                     | (6)        |
| LSY3699-1C  | <i>MATα sae2 ::KanMX DNA2-TEV-9MYC-HIS3 leu2::GAL-HO-LEU2 hml::oriPRS hmr::ampR</i>                        | This study |
| LSY3700-4D  | <i>MATα mre11-H125N DNA2-TEV-9MYC-HIS3 leu2::GAL-HO-LEU2 hml::oriPRS hmr::ampR</i>                         | This study |
| LSY3928-4A  | <i>rad50S-URA3 DNA2-TEV-9MYC-HIS3 leu2::GAL-HO-LEU2 hml::oriPRS hmr::ampR</i>                              | This study |
| LSY3965-4B  | <i>MATα sae2::SAE2-13MYC-TRP1 leu2::GAL-HO-LEU2 hml::oriPRS hmr::ampR RAD9-3HA-KanMX</i>                   | This study |
| LSY4003-9A  | <i>MATα mre11-H125N leu2::GAL-HO-LEU2 hml::oriPRS hmr::ampR sae2::SAE2-13MYC-TRP1 RAD9-3HA-KanMX</i>       | This study |
| LSY4003-1C  | <i>MATα rad50S-URA3 leu2::GAL-HO-LEU2 hml::oriPRS hmr::ampR sae2::SAE2-13MYC-TRP1 RAD9-3HA-KanMX</i>       | This study |
| LSY3942-8C  | <i>MATα leu2::GAL-HO-LEU2 hml::oriPRS hmr::ampR KanMX-GAL1-SAE2-13MYC-TRP1 RAD9-3HA-KanMX</i>              | This study |
| LSY3942-13A | <i>MATα mre11-H125N leu2::GAL-HO-LEU2 hml::oriPRS hmr::ampR KanMX-pGAL1-SAE2-13MYC-TRP1 RAD9-3HA-KanMX</i> | This study |
| LSY3943-35A | <i>MATα rad50S-URA3 leu2::GAL-HO-LEU2 hml::oriPRS hmr::ampR KanMX-pGAL1-SAE2-13MYC-TRP1 RAD9-3HA-KanMX</i> | This study |
| LSY4005-8D  | <i>MATα leu2::GAL-HO-LEU2 hml::oriPRS hmr::ampR</i>                                                        | This study |

|             |                                                                                                                                                          |            |
|-------------|----------------------------------------------------------------------------------------------------------------------------------------------------------|------------|
|             | <i>KanMX-pGAL1-SAE2-13MYC-TRP1 3HA-TEL1-URA3</i>                                                                                                         |            |
| LSY4005-11D | <i>MAT<math>\alpha</math> mre11-H125N leu2::pGAL-HO-LEU2 hml::oripRS<br/>hmr::ampR KanMX-pGAL1-SAE2-13MYC-TRP1<br/>3HA-TEL1-URA3</i>                     | This study |
| LSY4006-35B | <i>MAT<math>\alpha</math> rad50S-URA3 leu2::pGAL-HO-LEU2 hml::oripRS<br/>hmr::ampR KanMX-pGAL1-SAE2-13MYC-TRP1<br/>3HA-TEL1-URA3</i>                     | This study |
| LSY3670-3C  | <i>MAT<math>\alpha</math>-inc ade3::GAL-HO rad51::LEU2 lys2::NatMX4<br/>AVT2::lys-HOcs::KanMX6-(20kb)-TRP1-ys2 (SSA strain)</i>                          | This study |
| LSY3655-2   | <i>MAT<math>\alpha</math>-inc ade3::GAL-HO rad51::LEU2 lys2::NatMX4<br/>AVT2::lys-HOcs::KanMX6-(20kb)-TRP1-ys2 exo1::HIS3</i>                            | This study |
| LSY3669-36D | <i>MAT<math>\alpha</math>-inc ade3::GAL-HO rad51::LEU2 lys2::NatMX4<br/>AVT2::lys-HOcs::KanMX6-(20kb)-TRP1-ys2<br/>sae2::KanMX exo1::HIS3</i>            | This study |
| LSY3708-13B | <i>MAT<math>\alpha</math>-inc ade3::GAL-HO rad51::LEU2 lys2::NatMX4<br/>mre11-H125N-URA3<br/>AVT2::lys-HOcs::KanMX6-(20kb)-TRP1-ys2</i>                  | This study |
| LSY3925-57A | <i>MAT<math>\alpha</math>-inc ade3::GAL-HO rad51::LEU2 lys2::NatMX4<br/>rad50S-URA3<br/>AVT2::lys-HOcs::KanMX6-(20kb)-TRP1-ys2</i>                       | This study |
| LSY3687-1A  | <i>MAT<math>\alpha</math>-inc ade3::GAL-HO rad51::LEU2 lys2::NatMX4<br/>sae2::KanMX<br/>AVT2::lys-HOcs::KanMX6-(20kb)-TRP1-ys2</i>                       | This study |
| LSY3964-26A | <i>MAT<math>\alpha</math>-inc ade3::GAL-HO rad51::LEU2 lys2::NatMX4<br/>exo1-4S::A-13myc-HIS3<br/>AVT2::lys-HOcs::KanMX6-(20kb)-TRP1-ys2</i>             | This study |
| LSY3964-20A | <i>MAT<math>\alpha</math>-inc ade3::GAL-HO rad51::LEU2 lys2::NatMX4<br/>sae2::KanMX exo1-4S::A-13myc-HIS3<br/>AVT2::lys-HOcs::KanMX6-(20kb)-TRP1-ys2</i> | This study |
| LSY4326-4D  | <i>MAT<math>\alpha</math> rad9::NatMX TRP1::rad9-S462A, T474A<br/>(rad9-2A)</i>                                                                          | (9)        |
| LSY4328-4C  | <i>MAT<math>\alpha</math> sae2::KanMX rad9::NatMX TRP1::rad9-2A</i>                                                                                      | This study |
| LSY3539     | <i>MAT<math>\alpha</math> slx4::HIS3</i>                                                                                                                 | This study |

|             |                                                                                                                    |            |
|-------------|--------------------------------------------------------------------------------------------------------------------|------------|
| LSY4208-5C  | <i>MATa mre11-H125N-NatMX slx4::HIS3</i>                                                                           | This study |
| LSY4208-13A | <i>MATa rad50S-URA3 slx4::HIS3</i>                                                                                 | This study |
| LSY3562-2D  | <i>MATa sae2::KanMX slx4::HIS3</i>                                                                                 | This study |
| LSY4036-6D  | <i>MATα mec1::TRP1 sml1::HIS3 RAD9-3HA-KanMX6<br/>leu2::GAL-HO-LEU2 hml::oriPRS hmr::ampR</i>                      | This study |
| LSY4036-8A  | <i>MATα mec1::TRP1 sml1::HIS3 mre11-H125N<br/>RAD9-3HA-KanMX6 leu2::GAL-HO-LEU2 hml::oriPRS<br/>hmr::ampR</i>      | This study |
| LSY4037-9A  | <i>MATα mec1::TRP1 sml1::HIS3 rad50S-URA3<br/>RAD9-3HA-KanMX6 leu2::GAL-HO-LEU2 hml::oriPRS<br/>hmr::ampR</i>      | This study |
| LSY4038-11D | <i>MATα mec1::TRP1 sml1::HIS3 sae2 ::KanMX6<br/>RAD9-3HA-KanMX6 leu2 ::GAL-HO-LEU2 hml ::oriPRS<br/>hmr ::ampR</i> | This study |
| LSY4187-8C  | <i>sae2-S73, T90, S249, T279, S289 (sae2-5A)</i>                                                                   | This study |
| LSY4309-2B  | <i>mre11-H125N-NatMX sae2-5A</i>                                                                                   | This study |
| LSY4309-1A  | <i>rad9::HIS3 sae2-5A</i>                                                                                          | This study |
| LSY4309-1C  | <i>mre11-H125N-NatMX rad9::HIS3 sae2-5A</i>                                                                        | This study |
| LSY3832-1C  | <i>dot1 ::HphMX</i>                                                                                                | This study |
| LSY3832-2A  | <i>sae2 ::KanMX dot1 ::HphMX</i>                                                                                   | This study |
| LSY3561-1C  | <i>hta1-S129A hta2-S129A</i>                                                                                       | This study |
| LSY3832-2B  | <i>dot1 ::HphMX hta1-S129A hta2-S129A</i>                                                                          | This study |
| LSY3832-3B  | <i>dot1 ::HphMX hta1-S129A hta2-S129A sae2::kanMX</i>                                                              | This study |

All strains are W303 genetic background (*trp1-1 his3-11,15 can1-100 ura3-1 leu2-3,112 ade2-1 RAD5*), only the mating type and differences from this genotype are shown. The MAT genotype was not scored for some of the strains used for spot assays.

## References

1. Baroni E, Viscardi V, Cartagena-Lirola H, Lucchini G, & Longhese MP (2004) The functions of budding yeast Sae2 in the DNA damage response require Mec1- and Tel1-dependent phosphorylation. *Mol Cell Biol* 24(10):4151-4165.
2. Zou H & Rothstein R (1997) Holliday junctions accumulate in replication mutants via a RecA homolog-independent mechanism. *Cell* 90(1):87-96.

3. Mimitou EP & Symington LS (2010) Ku prevents Exo1 and Sgs1-dependent resection of DNA ends in the absence of a functional MRX complex or Sae2. *EMBO J* 29(19):3358-3369.
4. Deng SK, Gibb B, de Almeida MJ, Greene EC, & Symington LS (2014) RPA antagonizes microhomology-mediated repair of DNA double-strand breaks. *Nat Struct Mol Biol* 21(4):405-412.
5. Chen H, *et al.* (2015) Sae2 promotes DNA damage resistance by removing the Mre11-Rad50-Xrs2 complex from DNA and attenuating Rad53 signaling. *Proc Natl Acad Sci U S A* 112(15):E1880-1887.
6. Oh J, Al-Zain A, Cannavo E, Cejka P, & Symington LS (2016) Xrs2 Dependent and Independent Functions of the Mre11-Rad50 Complex. *Molecular cell* 64(2):405-415.
7. Jablonowski CM, *et al.* (2015) Termination of Replication Stress Signaling via Concerted Action of the Slx4 Scaffold and the PP4 Phosphatase. *Genetics* 201(3):937-949.
8. Morin I, *et al.* (2008) Checkpoint-dependent phosphorylation of Exo1 modulates the DNA damage response. *EMBO J* 27(18):2400-2410.
9. Pfander B & Diffley JF (2011) Dpb11 coordinates Mec1 kinase activation with cell cycle-regulated Rad9 recruitment. *EMBO J* 30(24):4897-4907.

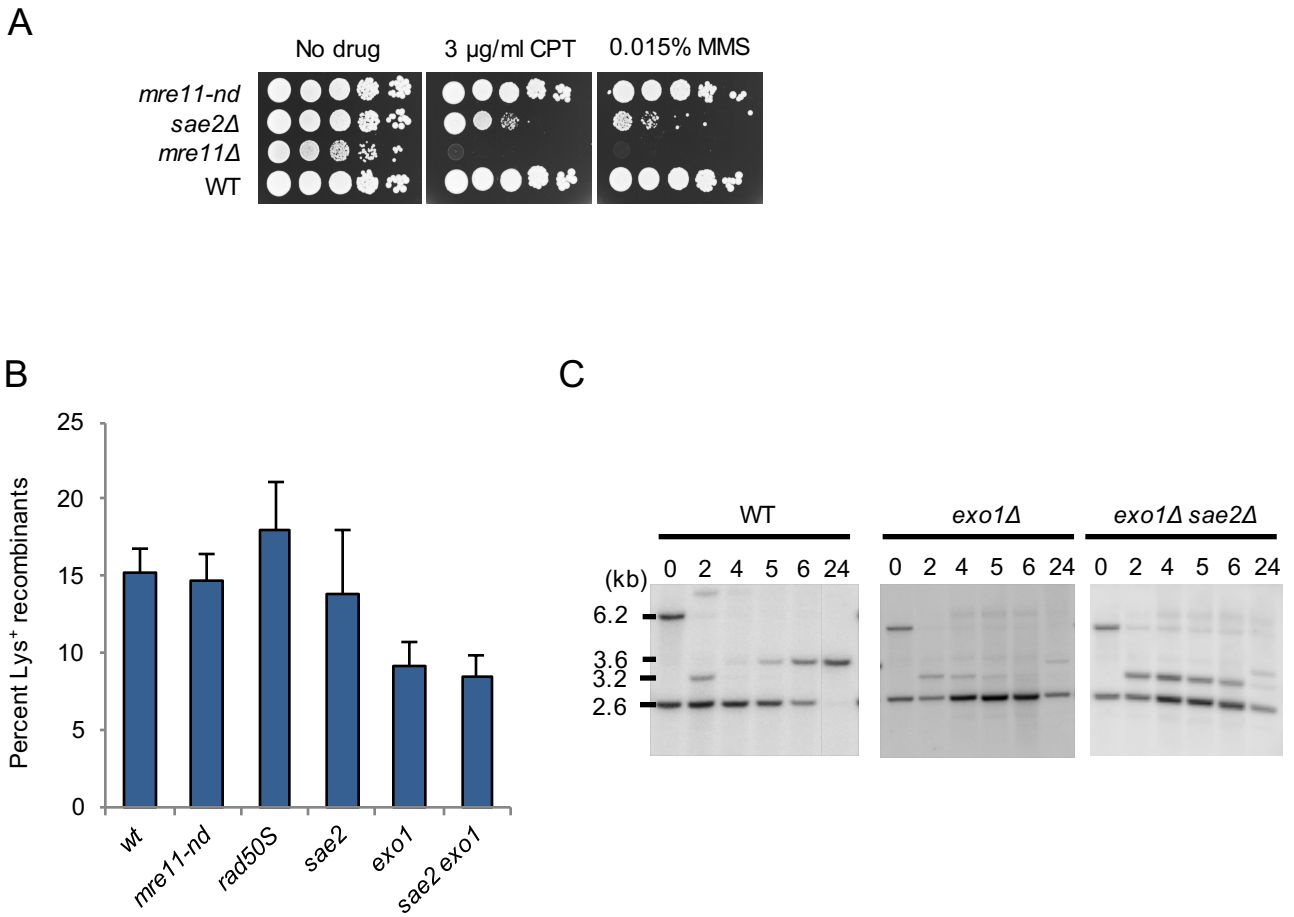

**Figure S1. DNA damage sensitivity and SSA phenotype of resection mutants.** **A** Ten-fold serial dilutions of the indicated strains spotted on agar plates with no additive, or with CPT or MMS. **B** The percent SSA as determined by the ratio of colony forming units (cfu) on SC-LYS + GAL medium to cfu on SC GLU-containing medium for the indicated strains. **C** Southern blot to detect the SSA product in WT, *exo1Δ* and *exo1Δ sae2Δ* strains.



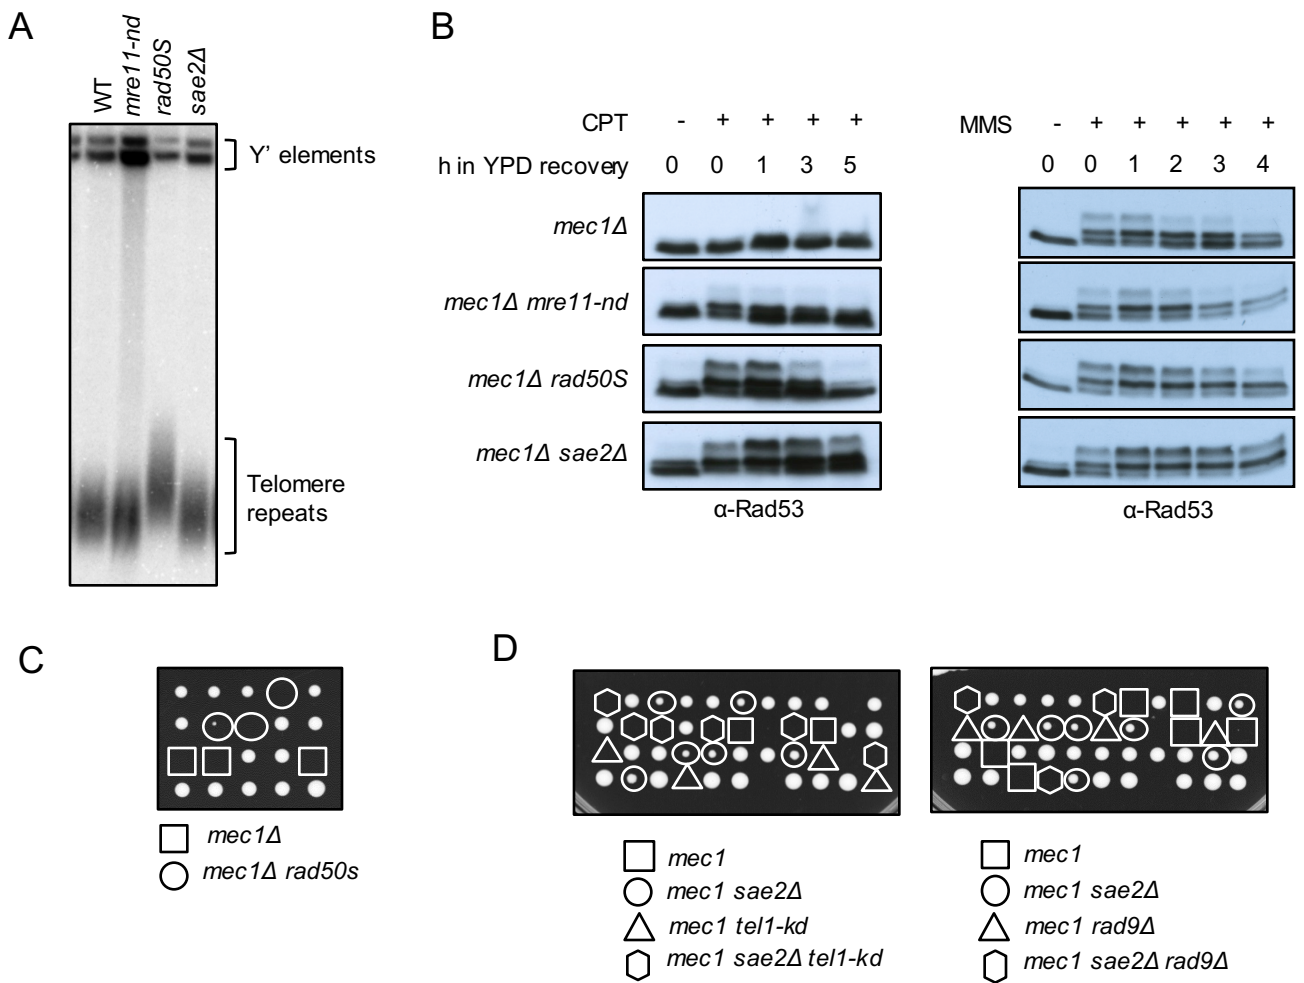

**Figure S2. Tel1 hyper-activation in *rad50S* and *sae2Δ* cells.** **A** Southern blot of *XhoI* digested genomic DNA probed with a Y'-telomere probe. **B** Western blot analysis showing Rad53 phosphorylation pattern in response to CPT or MMS. Log phase growing cells ( $t=0$ ) from indicated strains were treated with 10  $\mu\text{g}/\text{mL}$  CPT or 0.015% MMS for 1h and released into fresh YPD ( $t=0-5$ ). Protein samples from different time points before and after drug treatment were analyzed using anti-Rad53 antibodies. **C** Spore colonies from dissection of a *mec1Δ/MEC1 sml1Δ/SML1 RAD50/rad50S* heterozygous diploid. **D** Spore colonies from dissection of *mec1Δ/MEC1 sml1Δ/SML1 SAE2/sae2Δ TEL1/tel1-kd* and *mec1Δ/MEC1 sml1Δ/SML1 SAE2/sae2Δ RAD9/rad9Δ* heterozygous diploids. Note that only *SML1* segregants are indicated.

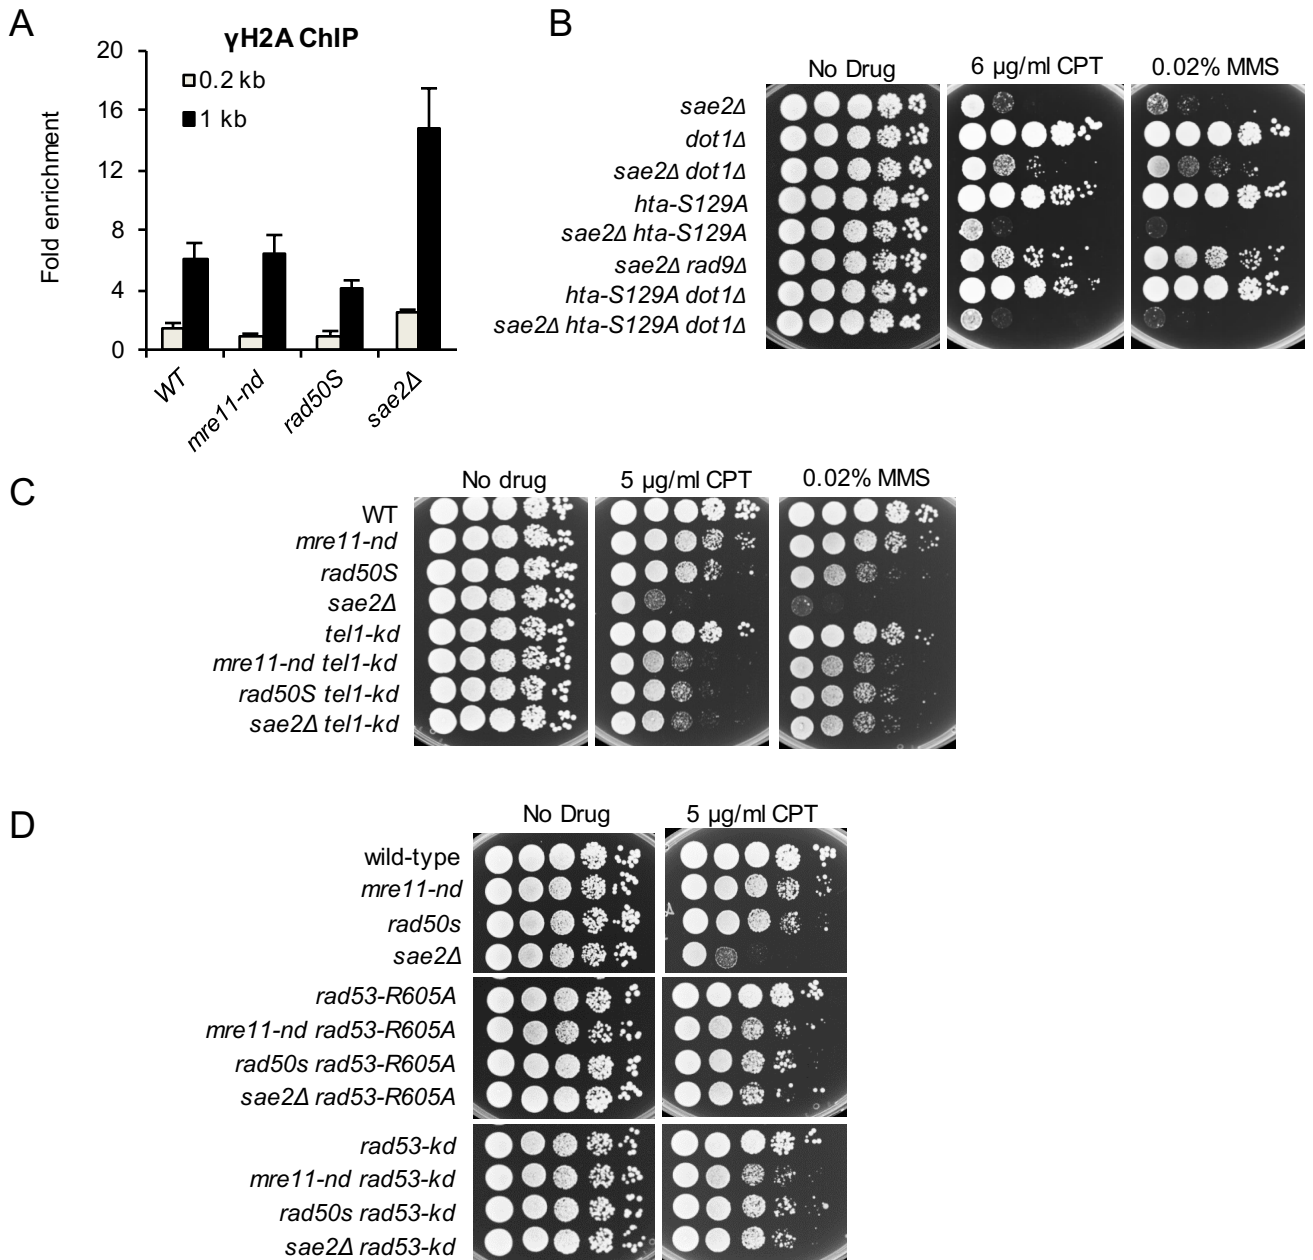

**Figure S3. Rad9 chromatin binding and Rad53 kinase activity contribute to *sae2 $\Delta$*  CPT sensitivity.** **A** The relative fold enrichment of  $\gamma$ H2A at 0.2 and 1 kb from the HO site was evaluated by ChIP- qPCR 3 hours after HO induction. **B** Ten-fold serial dilutions of *dot1 $\Delta$*  and *hta-S129A* derivatives spotted on plates without drug, or plates containing CPT or MMS at the indicated concentrations. **C** Ten-fold serial dilutions of *tel1-kd* derivatives spotted on plates without drug, or plates containing CPT or MMS at the indicated concentrations. **D** Ten-fold serial dilutions of *rad53-R605A* or *rad53-kd* derivatives spotted on plates without drug, or plates containing CPT at the indicated concentrations.

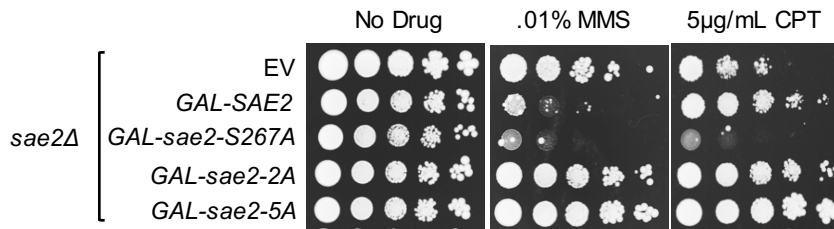

**Figure S4. Sae2 OE is toxic to cells.** Ten-fold serial dilutions of *sae2Δ* cells with EV, or the indicated *SAE2* allele expressed from the *GAL* promoter of a low copy number plasmid spotted on YPGal, YPGal + MMS or YPGal + CPT.
